# Supplementary material for: Lipid peroxidation causes endosomal antigen release for cross-presentation
Source: PubMed Central journal article supplement (PMC4764948; doi:10.1038/srep22064), 2016-02-24
Supplement: srep22064-s1.pdf [file srep22064-s1.pdf]

## Supplementary information

### Lipid peroxidation causes endosomal antigen release for cross-presentation

Ilse Dingjan<sup>1</sup>, Daniëlle RJ Verboogen<sup>1</sup>, Laurent M Paardekooper<sup>1</sup>, Natalia H Revelo<sup>1</sup>, Simone P Sittig<sup>1</sup>, Linda J Visser<sup>1</sup>, Gabriele Fischer von Mollard<sup>2</sup>, Stefanie SV Henriët<sup>3</sup>, Carl G Figdor<sup>1</sup>, Martin ter Beest<sup>1</sup>, Geert van den Bogaart<sup>1,4</sup>

#### Affiliations

<sup>1</sup>Department of Tumor Immunology, Radboud Institute for Molecular Life Sciences, Radboud University Medical Center, Nijmegen, 6525 GA, the Netherlands.

<sup>2</sup>Department of Chemistry, Bielefeld University, Bielefeld, 33501, Germany.

<sup>3</sup>Department of Pediatrics, Radboud University Medical Center, Nijmegen, 6525 GA, the Netherlands.

<sup>4</sup>**Corresponding author:** Geert van den Bogaart; Radboud University, Geert Grooteplein 26-28, 6525 GA Nijmegen; +31(0)243613662; Geert.vandenBogaart@RadboudUMC.nl

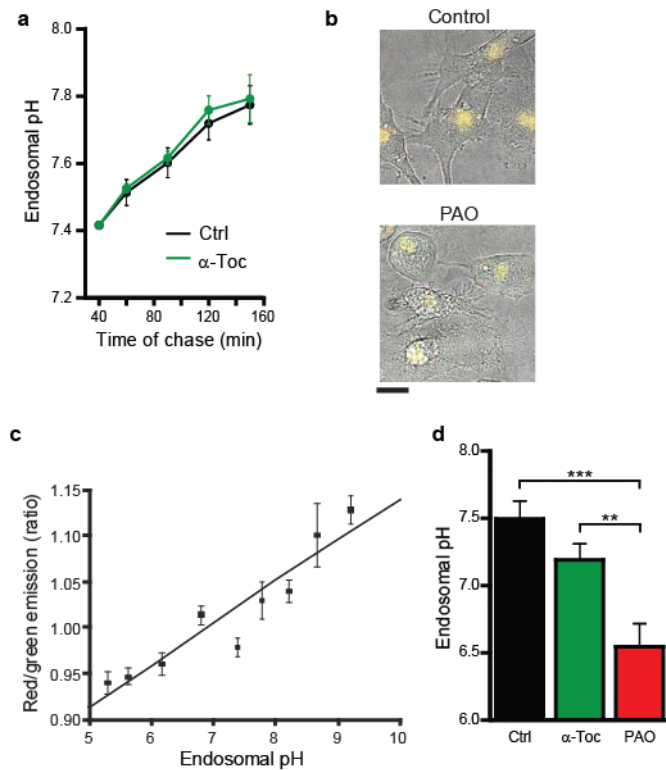

**Supplementary Fig. 1: Endosomal pH is unaffected by  $\alpha$ -tocopherol.** (a) Endosomal pH determined with the intensimetric probe pHrodo Green linked to OVA for DCs incubated with or without  $\alpha$ -tocopherol. The pH was calibrated by measuring the fluorescence of pHrodo Green in buffers of known pH. (b–d) Intensimetric probes are prone to artifacts caused by ROS-induced oxidation and we therefore confirmed the results from panel a with the ratiometric probe SNARF-1 conjugated to dextran. (b) Confocal microscope images of DCs with SNARF-1 with and without PAO. PAO results in endosomal acidification apparent from a green shift of the fluorescence of SNARF-1. Scale bar, 10  $\mu$ m. (c) The pH calibration curve was created by imaging cells after uptake of SNARF-1-labeled dextran and incubation with buffers of different pH and 0.003% Triton-X100. The curve was fitted with a standard reaction model with  $pK_a = 7.3$  for SNARF-1 (at 37°C; Life Technologies; solid line). (d) Average of endosomal pH of > 100 cells (pooled from 3 independent experiments) within 30–60 min after SNARF-1 uptake. PAO resulted in acidification of endosomal compartments. Results show mean  $\pm$  S.E.M of 3 donors.

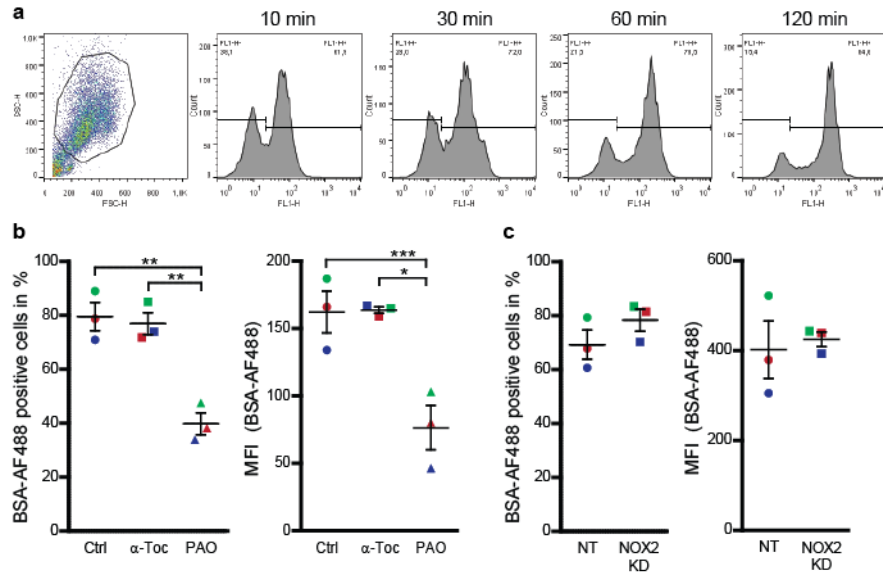

**Supplementary Fig. 2: Controls for the endosomal leakage experiments.** (a) Representative FACS data for uptake experiments of BSA conjugated to Alexa fluor 488 (BSA-AF488) by DCs. Left dot plot: side (SSC) and forward (FSC) scatter plot for gating of DCs. Right histograms: fluorescence distributions of BSA-AF488 signal at the indicated times after begin of uptake. (b-c) Uptake of BSA conjugated to Alexa fluor 488 (BSA-AF488) was measured after 60 min for DCs cultured in the absence (Ctrl) or presence of  $\alpha$ -tocopherol ( $\alpha$ -Toc) or PAO (b) as well as for NOX2<sup>KD</sup> DCs (c). NT: non-targeting siRNA control. PAO decreased uptake of BSA by ~50%. Results show results of 3 donors (indicated with different colors).

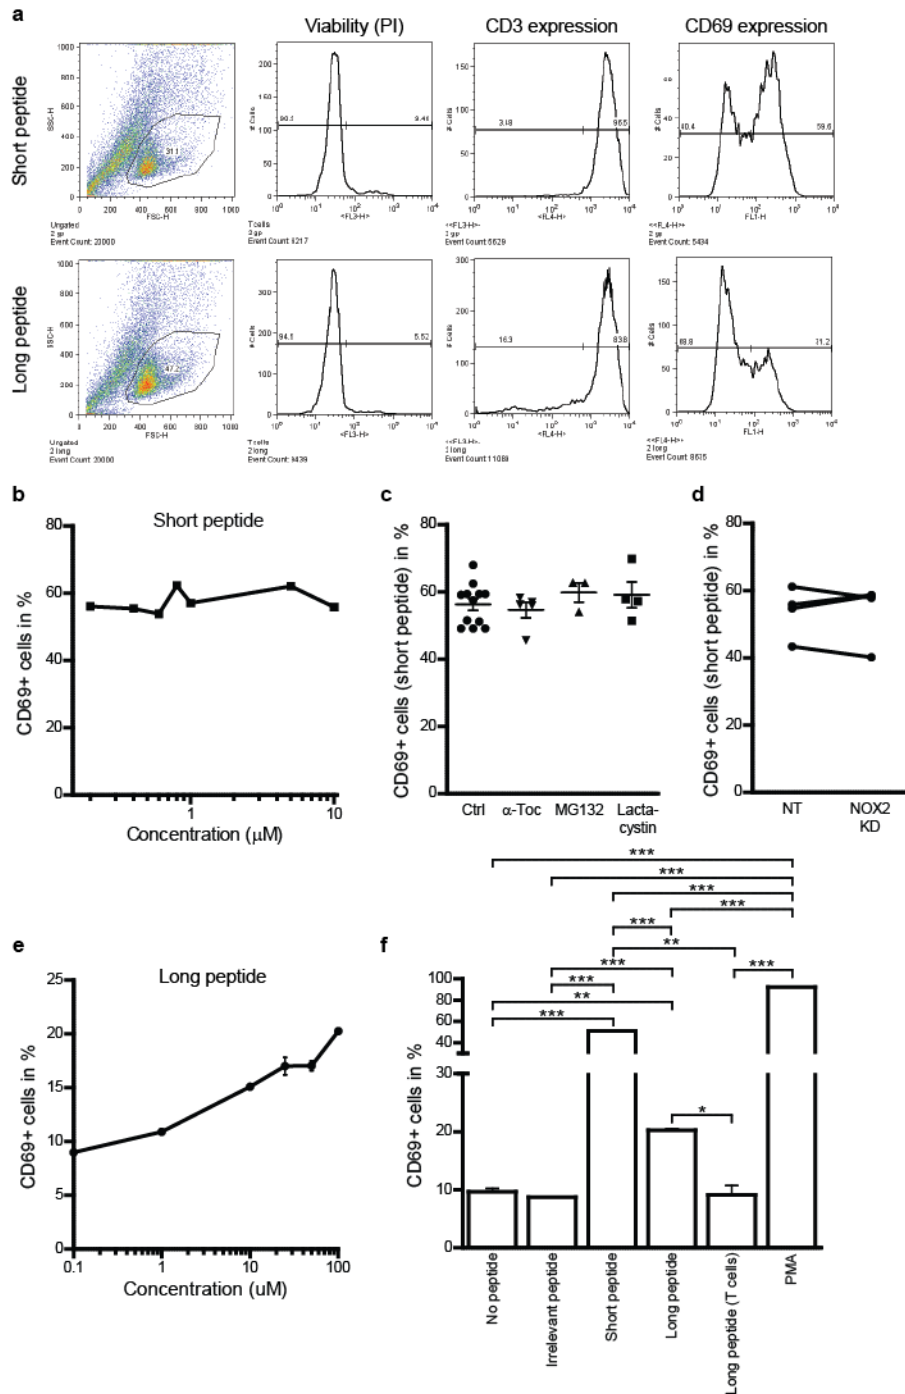

**Supplementary Fig. 3: Short and long peptide controls for Jurkat T cell activation.** (a) Representative FACS data for analysis of CD69-positive T cells. Jurkat T cells were selected based on scatter (left dot plot) and gating on PI-negative, CD3-positive cells (middle histograms). Right histogram: CD69 intensity distribution for Jurkat T cells.

(b) Activation of Jurkat T cells by DCs incubated with a concentration range of short peptide (gp100 residues 280–288). For all concentrations, we observed a maximum activation of ~55% CD69-positive T cells with short peptide. (c-d) Jurkat T cells activation assay with DCs incubated with  $\alpha$ -tocopherol ( $\alpha$ -Toc), MG132 or lactacystein (c) and with NOX2<sup>KD</sup> DCs (d) after incubation with short peptide. (e) Similar to panel b, but now for a concentration range of long peptide (residues 272-300). (f) CD69 expression on T cells after incubation with DCs treated with irrelevant, short or long peptide. As a negative control, T cells were incubated with long peptide in absence of DCs. As a positive control, T cells were activated by PMA. Results show mean  $\pm$  spread of 2 donors.

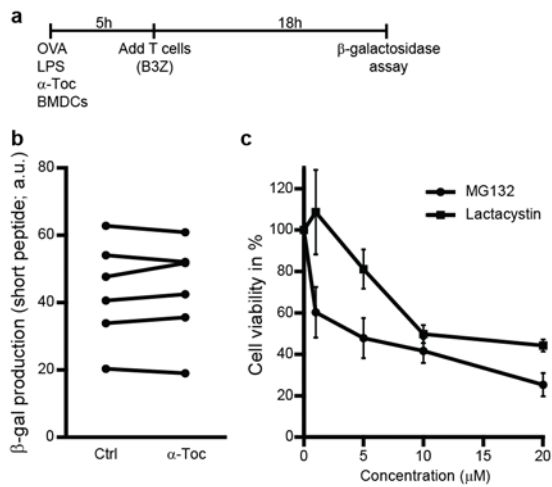

**Supplementary Fig. 4: B3Z T cell activation assay with mouse BMDCs.** (a) Time line of the B3Z T cell activation assay with BMDCs presenting OVA. (b) B3Z T cell activation assay with BMDCs incubated with  $\alpha$ -tocopherol ( $\alpha$ -Toc) after incubation with 5 ng/ml OVA peptide (SIINFEKL). (c) Toxicity of proteasome inhibitors MG132 and lactacystin. BMDCs were treated with different concentrations of MG132 and lactacystin for 4 h at 37°C. After incubation, the medium was removed and 0.5 mg/ml MTT was added to each sample. After 1-4 hours incubation, lysis buffer was added and absorbance was measured at 595 nm to determine cell viability. Results show average  $\pm$  SEM of at least 3 experiments.
